# Supplementary material for: Methods, applications, interpretations and challenges of interrupted time series (ITS) data: protocol for a scoping review
Source: PubMed Central journal article supplement — BMJ Open. 2017 Jul 2;7(6):e016018. doi: 10.1136/bmjopen-2017-016018 (PMC5726134; doi:10.1136/bmjopen-2017-016018), 2017-07-02
Supplement: bmjopen-2017-016018.draft_revisions.pdf [file bmjopen-2017-016018.draft_revisions.pdf]

# BMJ Open

## Methods, Applications, Interpretations and Challenges of Interrupted Time Series (ITS) Data: Protocol for a Scoping Review

|                                 |                                                                                                                                                                                                                                                                                                                                                                                                                                                                                                                                                                                                                                                                                                                                                                                                                                                                                                                                    |
|---------------------------------|------------------------------------------------------------------------------------------------------------------------------------------------------------------------------------------------------------------------------------------------------------------------------------------------------------------------------------------------------------------------------------------------------------------------------------------------------------------------------------------------------------------------------------------------------------------------------------------------------------------------------------------------------------------------------------------------------------------------------------------------------------------------------------------------------------------------------------------------------------------------------------------------------------------------------------|
| Journal:                        | <i>BMJ Open</i>                                                                                                                                                                                                                                                                                                                                                                                                                                                                                                                                                                                                                                                                                                                                                                                                                                                                                                                    |
| Manuscript ID                   | bmjopen-2017-016018                                                                                                                                                                                                                                                                                                                                                                                                                                                                                                                                                                                                                                                                                                                                                                                                                                                                                                                |
| Article Type:                   | Protocol                                                                                                                                                                                                                                                                                                                                                                                                                                                                                                                                                                                                                                                                                                                                                                                                                                                                                                                           |
| Date Submitted by the Author:   | 18-Jan-2017                                                                                                                                                                                                                                                                                                                                                                                                                                                                                                                                                                                                                                                                                                                                                                                                                                                                                                                        |
| Complete List of Authors:       | Ewusie, Joycelyne; McMaster University<br>Blondal, Erik; University of Toronto, Institute of Health Policy Management and Evaluation (IHPME); Li Ka Shing Knowledge Institute, St Michael's Hospital<br>Soobiah, Charlene; University of Toronto, Institute of Health Policy Management and Evaluation (IHPME); Li Ka Shing Knowledge Institute, St Michael's Hospital<br>Beyene, Joseph; McMaster University, Department of Clinical Epidemiology and Biostatistics<br>Thabane, Lehana; McMaster University, Department of Clinical Epidemiology and Biostatistics; St Joseph's Healthcare, Biostatistics Unit, Father Sean O'Sullivan Research Centre<br>Straus, Sharon; St. Michael's Hospital, Li Ka Shing Knowledge Institute; University of Toronto Faculty of Medicine<br>Hamid, Jemila; Li Ka Shing Knowledge Institute, St Michael's Hospital; McMaster University, Department of Clinical Epidemiology and Biostatistics |
| <b>Primary Subject Heading</b>: | Research methods                                                                                                                                                                                                                                                                                                                                                                                                                                                                                                                                                                                                                                                                                                                                                                                                                                                                                                                   |
| Secondary Subject Heading:      | Geriatric medicine, Epidemiology                                                                                                                                                                                                                                                                                                                                                                                                                                                                                                                                                                                                                                                                                                                                                                                                                                                                                                   |
| Keywords:                       | Interrupted time series, segmented regression, scoping review                                                                                                                                                                                                                                                                                                                                                                                                                                                                                                                                                                                                                                                                                                                                                                                                                                                                      |
|                                 |                                                                                                                                                                                                                                                                                                                                                                                                                                                                                                                                                                                                                                                                                                                                                                                                                                                                                                                                    |

SCHOLARONE™  
Manuscripts

# Methods, Applications, Interpretations and Challenges of Interrupted Time Series (ITS) Data: Protocol for a Scoping Review

Joycelyne E. Ewusie,<sup>1</sup> Erik Blondal,<sup>2,3</sup> Charlene Soobiah,<sup>2,3</sup> Joseph Beyene,<sup>1</sup> Lehana Thabane,<sup>1,4</sup> Sharon Straus,<sup>2,5</sup> Jemila S Hamid<sup>1,2</sup>

<sup>1</sup>Department of Clinical Epidemiology and Biostatistics, McMaster University, Hamilton, Ontario, Canada

<sup>2</sup>Li Ka Shing Knowledge Institute of St Michael's Hospital, Toronto, Ontario, Canada

<sup>3</sup>Institute of Health Policy Management and Evaluation (IHPME), University of Toronto, Toronto, Ontario, Canada

<sup>4</sup>Biostatistics Unit, Father Sean O'Sullivan Research Centre, St Joseph's Healthcare, Hamilton, Ontario, Canada

<sup>5</sup>Department of Medicine, Faculty of Medicine, University of Toronto, Toronto, Ontario, Canada

Corresponding Author

Dr Jemila S Hamid: [jhamid@mcmaster.ca](mailto:jhamid@mcmaster.ca)

## ABSTRACT

**Objectives:** Interrupted time series (ITS) design involves collecting data across multiple time points before and after the implementation of an intervention to assess the effect of the intervention on an outcome. ITS designs have become increasingly common in recent times with frequent use in assessing impact of evidence implementation interventions. Several statistical methods are currently available for analyzing data from ITS designs, however, there is a lack of guidance on which methods are optimal for different data types and on their implications in interpreting results. Our objective is to conduct a scoping review of existing methods for analyzing ITS data, to summarize their characteristics and properties, as well as to examine how the results are reported. We also aim to identify gaps and methodological deficiencies.

**Methods and analysis:** We will search electronic databases from inception until August 2016 (e.g., MEDLINE, and JSTOR). Two reviewers will independently screen titles, abstracts and full-text articles and complete the data abstraction. The anticipated outcome will be a summarized description of all the methods that have been used in analyzing ITS data in health research, how those methods were applied, their strengths and limitations and the transparency of interpretation/reporting of the results. We will provide summary tables of the characteristics of the included studies. We will also describe the similarities and differences of the various methods.

**Ethics and dissemination:** Ethical approval is not required for this study since we are just considering the methods used in the analysis and there will not be identifiable patient data. Results will be disseminated through open access peer-reviewed publications.

### Strengths and Limitations of this Study

- Interrupted time series (ITS) is the strongest and most commonly utilized quasi-experimental design that is used to assess the effect of an intervention when randomization is not feasible.
- This review will be the first of its kind to provide a comprehensive overview of the methods available in the analysis of data obtained from ITS designs as well as provide characteristics of these current methods as applied in health research.
- The review is limited to articles published in English language.
- This review study will not assess the quality of the papers or the methods themselves.

**Keywords:** Interrupted time series, segmented regression, scoping review

## INTRODUCTION

Quasi-experimental designs, such as interrupted time series and regression discontinuity designs are alternative approaches to assess the effect of interventions in healthcare settings when randomization is impossible, unethical or notfeasible due to scarce resources [1]. Interrupted time series (ITS) is a robust quasi-experimental design and is most commonly utilized in implementation science to evaluate the impact of interventions such as quality improvement programs or policy changes [2, 3]. In ITS designs, data are collected before and after the implementation or introduction of an intervention to examine whether the intervention influenced the outcome of interest versus the underlying secular trend [4].

In recent times, ITS design has been increasingly common with several applications in clinical and health services research. For instance, the ITS method has been used in assessing the impact of a variety of evidence implementation strategies in different settings, which include assessing the effect of prevention programs, policy changes and quality improvement initiatives in hospitals [3,5,6,7,8]. ITS designs are included in Cochrane reviews done by the Effective Practice and Organisation of Care Review group [9].

There are several models for analyzing ITS data such as segmented regression analysis and ARIMA. Segmented regression or change-point model is likely the most common statistical method for analyzing data from ITS design [10]. In segmented regression analysis, a piece-wise regression is fitted to the data allowing each segment of the time series to exhibit different levels and trends. The effect of the intervention is then examined by comparing the slopes and intercepts for the pre- and post-intervention phases [11]. A change in the intercept or level constitutes an immediate intervention effect while a change in slope or trend implies an effect that was experienced over time. A change in trend also allows us to measure the sustainability of

1  
2  
3 the impact of the intervention. Furthermore, segmented regression analysis enables analysts to  
4 control for other variables, other than the intervention, that can cause a change in level or trend  
5 of the outcome of interest [11].  
6  
7  
8  
9

10  
11 Despite the various statistical methods that are available for analyzing ITS data, it is not  
12 clear which methods are optimal for the different data types and how using different analyses  
13 may affect results. As such, researchers and particularly, novice users of the ITS design are  
14 unaware of the various methods available. Thus, researchers often use methods such as  
15 segmented linear regression to analyze their ITS data, which can lead to spurious results and  
16 consequently unreliable conclusions about the effect of interventions. Commonly used methods  
17 for analyzing ITS data are often inappropriate when the data are aggregated per time point or the  
18 data are from a skewed distribution, and are often susceptible to aggregation bias, imprecision  
19 and loss of power [3,7]. It is therefore imperative that the various methods available for  
20 analyzing ITS data are identified to not only inform researchers of which methods are  
21 appropriate for different data types but also to inform future research such that the limitations  
22 and gaps of the current methods can be adequately addressed.  
23  
24  
25  
26  
27  
28  
29  
30  
31  
32  
33  
34  
35  
36  
37  
38

39  
40 Our goal is thus to conduct a scoping review to examine the current methods used in ITS  
41 analysis, compare the methods and evaluate the appropriateness of the interpretation of findings  
42 based on the type of analyses performed. We aim to:  
43  
44  
45  
46

- 47 1. Identify and describe available methods used in ITS data analysis.
- 48 2. Describe the similarities and differences between the methods.
- 49 3. Describe the strengths and limitations of each method.
- 50 4. Provide a review of the application of the methods, that is how they are used, where they  
51 are used and the information they provide.  
52  
53  
54  
55  
56  
57  
58  
59  
60

- 1
  - 2
  - 3
  - 4
  - 5
  - 6
  - 7
  - 8
  - 9
  - 10
  - 11
  - 12
  - 13
  - 14
  - 15
  - 16
  - 17
  - 18
  - 19
  - 20
  - 21
  - 22
  - 23
  - 24
  - 25
  - 26
  - 27
  - 28
  - 29
  - 30
  - 31
  - 32
  - 33
  - 34
  - 35
  - 36
  - 37
  - 38
  - 39
  - 40
  - 41
  - 42
  - 43
  - 44
  - 45
  - 46
  - 47
  - 48
  - 49
  - 50
  - 51
  - 52
  - 53
  - 54
  - 55
  - 56
  - 57
  - 58
  - 59
  - 60
5. Examine how results are reported and provide a comprehensive description of their interpretation
  6. Identify gaps in methodology and provide direction for future research.

## **METHODS AND ANALYSIS**

We will conduct a scoping review using the methods proposed by Arkley and O'Malley [12] and the Joanna Briggs Handbook for conducting systematic scoping reviews [13]. We will first perform a systematic literature search for health research studies that employed interrupted time series design and then use the methodological framework of Arkley and O'Malley to facilitate the identification of gaps and methodological deficiencies in the existing literature.

### **Search Strategy**

For this study, an experienced information scientist helped to develop the search strategy which will be used to search electronic databases including MEDLINE, JSTOR, PUBMED, EMBASE, CINAHL, Web of Science and the CochraneLibrary from inception until August 2016 for relevant articles. Our electronic search will be supplemented by searching for published conference abstracts from relevant statistical conferences and contacting methodological experts in the field of ITS to identify difficult-to-locate or unpublished material. A draft of the literature search for MEDLINE can be found in Appendix A. The search strategy will be modified

1  
2  
3 accordingly when necessary for other databases. Additionally, references of the included studies  
4  
5 will be scanned for relevant articles.  
6  
7  
8  
9

## 10 11 **Eligibility Criteria**

12  
13  
14 All studies that report the development, application or comparison of methods employed in the  
15  
16 analysis of ITS data will be included. To be included in the analysis, studies must have at least  
17  
18 three time points before and after the intervention, have a clearly defined point in time when the  
19  
20 intervention was implemented and the study outcomes must be measured objectively. This is in  
21  
22 accordance with the Effective Practice and Organization of Care (EPOC) Cochrane Group  
23  
24 definition of an ITS design [9]. There will be no restrictions on the publication status. We will  
25  
26 exclude ITS studies that are not related to health research. We define health based on the WHO  
27  
28 definition that is, complete mental, physical and social well-being  
29  
30 (<http://www.who.int/about/definition/en/print.html>). Studies that were written in languages other  
31  
32 than English will be excluded due to resource limitations. Review papers will be excluded but  
33  
34 their references will be scanned for relevant articles.  
35  
36  
37  
38  
39  
40  
41  
42  
43

## 44 **Study Selection**

45  
46 We will import search results, screen citations and full text articles into Endnote X6 desktop  
47  
48 version. A calibration exercise will be held prior to the commencement of screening of titles and  
49  
50 abstracts to ensure reliability. For these pilot runs, each reviewer will screen a random sample of  
51  
52 50 citations for inclusion. Inter-rater agreement for study inclusion will then be calculated and a  
53  
54 percentage agreement value >80% will imply we can commence screening. A value <80% will  
55  
56  
57  
58  
59  
60

1  
2  
3 imply poor agreement and hence the eligibility criteria will be modified and clarified with the  
4  
5 reviewers. A second pilot will be run with another random sample of 50 citations. This process  
6  
7 will be repeated until we reach an agreement >80% and then the screening will begin. Each title  
8  
9 and abstract will be screened independently by two reviewers (CS or EB and JEE) for inclusion  
10  
11 using the eligibility criteria (Level 1 screening). This will be followed by full text screening of  
12  
13 potentially relevant articles by the reviewers to determine inclusion using the same or modified  
14  
15 eligibility criteria (Level 2 screening). If the eligibility criteria for level 2 are modified, a training  
16  
17 session will be conducted prior to level 2 screening. Conflicts will be resolved by discussion or  
18  
19 involvement of a third reviewer (JSH or JB). The PRISMA flow chart will be used to report  
20  
21 study selection. A draft of the eligibility form can be found in Appendix B.  
22  
23  
24  
25  
26  
27  
28  
29

### 30 **Data Abstraction**

31  
32 General study characteristics such as authorship and year of publication will be abstracted. Other  
33  
34 characteristics will be abstracted based on the type of article. For instance, for methodological  
35  
36 articles we will obtain the general description of the methods, the type of outcome (e.g.  
37  
38 continuous, binary), and the similarities and differences of the methods either reported by the  
39  
40 authors or based on our own perspective. For articles that report the use of an ITS  
41  
42 design/analysis (application articles), data to be abstracted will include the characteristics of the  
43  
44 study design (number of intervention phases, e.g. Pre-and Post-intervention for 2 phases), the  
45  
46 rationale for using an ITS design/analysis, the statistical methods used, assumptions checked and  
47  
48 approaches used to summarize the results. Examples used in methodological articles will be  
49  
50 treated as separate applications and all relevant data will be extracted where necessary. A draft of  
51  
52 the data abstraction form is found in Appendix C. The data abstraction form will be piloted on a  
53  
54  
55  
56  
57  
58  
59  
60



1  
2  
3 random sample of 50 included studies and modified as required. The abstraction process will be  
4  
5 completed by JEE in consultations with JSH.  
6  
7  
8  
9

## 10 11 **Risk of bias appraisal**

12 Since this is a scoping review, we will not appraise methodological quality or risk of bias of  
13  
14 included studies [12].  
15  
16  
17  
18  
19

## 20 21 **Data Synthesis**

22 For the descriptive analysis, information will be summarized based on the type of articles the  
23  
24 data was extracted from. For the methods papers, we will narratively describe the method used  
25  
26 for analysis, the assumptions made or tested, outcome data type such as continuous or binary,  
27  
28 and applicability of the method to different outcomes of interest based on information provided  
29  
30 by the authors, the data summarization process for appropriate ITS analysis as well as the  
31  
32 similarities and differences between different methods.  
33  
34  
35  
36  
37  
38  
39

40 For the application papers, we will summarise; the frequency of use of the method; the  
41  
42 kind of data the method is applied to such as audit, and survey data; the setting in which the ITS  
43  
44 design was implemented, such as hospitals or communities; and number of interruption times or  
45  
46 phases of intervention.  
47  
48  
49

50 In addition, we will evaluate results interpretation as well as the transparency of reporting  
51  
52 of findings by assessing the information provided by the authors. This will include information  
53  
54 on the different ways estimates obtained are reported and interpreted. The characteristics of the  
55  
56 included studies will be provided using summary tables and matrix tables will also be created to  
57  
58  
59  
60

1  
2  
3 compare the various ITS methods and the different ways of reporting and interpretation of  
4 findings based on how the data was summarized for analysis. Quantitative data such as the  
5 number of time points and number of patients per timepoint will be summarized by medians and  
6 IQRs and categorical data such as outcome data type will be summarized by frequencies and  
7 percentages. Finally, we will provide a summary of the methodological gaps that will be  
8 identified and highlight some potential areas for future research.  
9  
10  
11  
12  
13  
14  
15  
16  
17  
18  
19  
20  
21

## 22 **ETHICS AND DISSEMINATION**

23  
24 This is a scoping review of completed studies and hence no ethical approval is required. Quasi-  
25 experimental designs, such as ITS have been identified as the best alternative to investigate the  
26 impact of an intervention when randomization is not feasible and has been utilized several times  
27 in implementation science [1]. There have been several limitations that have been identified with  
28 the frequently used methods of analyzing data from ITS design making them suboptimal [3, 4, 7,  
29 8]. For example, when segmented regression is applied to aggregated data where data at each  
30 time point is no longer observed but estimated and hence associated with imprecision.  
31 Additionally, although several methods exist, it is not clear which of the methods are optimal for  
32 different data types. Finding out the various methods available and when each method will be  
33 appropriate is necessary to ensure quality analysis of data since using different analyses may lead  
34 to different results.  
35  
36  
37  
38  
39  
40  
41  
42  
43  
44  
45  
46  
47  
48  
49

50  
51 This study will provide guidance on the appropriate methods to be used under different  
52 scenarios and thus strengthen the validity of research that utilizes ITS methods. Subsequently,  
53 we will identify methodological gaps for future research into various ways of improving ITS data  
54  
55  
56  
57  
58  
59  
60

1  
2  
3 analysis through both simulation and empirical studies. This review will be the first of its kind to  
4 provide a comprehensive overview of the methods available in the analysis of data obtained from  
5  
6 quasi-experimental designs as well as provide characteristics of these current methods as applied  
7  
8 in health research. Informed consent and ethical assessment was not required for this study since  
9  
10 secondary data with non-identifiable individual patient data will be used.  
11  
12  
13

14  
15 This scoping review will be relevant not just to statisticians and methodologists but also  
16  
17 to other stakeholders such as health professionals and policy makers, and most importantly those  
18  
19 interested in implementation science.  
20  
21  
22  
23  
24  
25  
26

### 27 **Acknowledgement**

28  
29 The authors thank Mr. Andrew Colgoni for helping to develop the search strategy for the  
30 literature search.  
31  
32

### 33 **Contributors**

34  
35 JEE, SES and JSH conceived and designed the study and helped write the draft protocol. JB and  
36  
37 LT helped design the study and reviewed the protocol critically for intellectual content. EB and  
38  
39 CS participated in data collection and edited the protocol. All authors have read and approved the  
40 final protocol.  
41

### 42 **Funding**

43  
44 This research received no specific grant from any funding agency in the public, commercial or  
45 not-for-profit sectors.  
46  
47

### 48 **Competing interests**

49  
50 None declared.  
51  
52  
53  
54

## 55 **References**

56  
57  
58  
59  
60

- 1  
2  
3 1. Michielutte R, Shelton B, Paskett ED, Tatum CM, Velez R. Use of an interrupted time-  
4 series design to evaluate a cancer screening program. *Health Education Research, Theory*  
5 *and Practice* 2000,15(5):615-623  
6  
7
- 8 2. Wagner AK, Soumerai SB, Ghang F, Ross-Degnan D. Segmented regression analysis of  
9 interrupted time series studies in medication use research. *Journal of Clinical Pharmacy*  
10 *and Therapeutics* 2002, 27:299-309  
11  
12
- 13 3. Taljaard M, Mckenzie J, Ramsay CR, Grimshaw JM. The use of segmented regression in  
14 analyzing interrupted time series studies: an example in pre-hospital ambulance care.  
15 *Implementation Science* 2014, 9:77  
16  
17
- 18 4. Ramsay CR, Matowe L, Grilli R, Grimshaw JM, Thomas RE. Interrupted time series  
19 designs in health technology assessment: lessons from two systematic reviews of  
20 behaviour change strategies. *International Journal of Health Technology Assessment in*  
21 *Health Care* 2003; 19:613-23.  
22  
23
- 24 5. Kastner M, Sawka AM, Hamid JS, Chen M, Thorpe K, Chignell M, Ewusie J, Marquez  
25 C, Newton D, Straus SE. A knowledge translation tool improved osteoporosis disease  
26 management in primary care: an interrupted time series analysis. *Implementation Science*  
27 2014, 9:109 doi:10.1186/s13012-014-0109-9  
28  
29
- 30 6. Liu B, Almaawiy U, Moore JE, Chan WH, Straus SE and the MOVE ON Team.  
31 Evaluation of a multisite educational intervention to improve mobilization of older  
32 patients in hospital: protocol for mobilization of vulnerable elders in Ontario (MOVE  
33 ON). *Implementation Science* 2013, 8:76  
34  
35
- 36 7. Gebski V, Ellingson K, Edwards J, Jernigan J, Kleinbaum D. Modelling interrupted time  
37 series to evaluate prevention and control of infection in healthcare. *Epidemiology and*  
38 *Infection*. 2012 Dec 1;140(12):2131-41.  
39  
40
- 41 8. Zhang F, Wagner AK, Soumerai SB, Ross-Degnan D. Methods for estimating confidence  
42 intervals in interrupted time series analyses of health interventions. *Journal of Clinical*  
43 *Epidemiology* 2009,62:143-148  
44  
45
- 46 9. Bero L, Grilli R, Grimshaw JM, et al. The Cochrane Effective Practice and Organisation  
47 of care Group (EPOC) Module. In: *The Cochrane Library*. Oxford: Update Software,  
48 2002 Issue 1.  
49  
50
- 51 10. Shardell M, Harris AD, El-Kamary S, Furuno JP, Miller R, Perencevich EN. Statistical  
52 analysis and application of quasi experiments to antimicrobial resistance intervention  
53 studies. *Antimicrobial resistance* 2007, 45:901:907.  
54  
55  
56  
57  
58  
59  
60

11. Wang, Joanna JJ, Scott W, Raphael G, Jake O. "A comparison of statistical methods in interrupted time series analysis to estimate an intervention effect." In Australasian Road Safety Research, Policing and Education Conference. 2013.
12. Arksey H, O'Malley L. "Scoping studies: towards a methodological framework." International Journal of social research methodology 2005, 8.1:19-32.
13. Peters MD, Godfrey CM, Khalil H, McInerney P, Parker D, Soares CB. Guidance for conducting systematic scoping reviews. International journal of evidence-based healthcare 2015, 13(3), 141-146.

#### APPENDIX A:

Database: Ovid MEDLINE(R) In-Process & Other Non-Indexed Citations, Ovid MEDLINE(R) Daily and Ovid MEDLINE(R) <1946 to Present>

1  
2  
3 Search Strategy:  
4  
5 -----  
6

- 7 1 Interrupted Time Series Analysis.mp.  
8  
9 2 "change point model\$.mp.  
10  
11 3 Interrupted Time Series Analysis/  
12  
13 4 (interrupt\$ adj3 (time\$ series\$ or time-series)).mp.  
14  
15 5 (Interven\$ adj3 (time\$ series\$ or time-series)).mp.  
16  
17 6 (segment\$ adj2 regression\$.mp.  
18  
19 7 ((time\$ series\$ or time-series) adj2 regression\$.mp.  
20  
21 8 1 or 2 or 3 or 4 or 5 or 6 or 7  
22  
23 9 limit 8 to english language  
24  
25  
26  
27  
28  
29  
30  
31  
32  
33  
34  
35  
36  
37  
38  
39  
40  
41  
42  
43  
44  
45  
46  
47  
48  
49  
50  
51  
52  
53  
54  
55  
56  
57  
58  
59  
60

## APPENDIX B:

## ELIGIBILITY CRITERIA

**Level 1 screening**

1. Does this paper report on a method or application/review of ITS design or analysis?

YES \_\_\_\_

NO \_\_\_\_

UNCLEAR \_\_\_\_

2. Is the study related to health as defined by the WHO (i.e., philosophy, health, education)?

YES \_\_\_\_

NO \_\_\_\_

UNCLEAR \_\_\_\_

If you answer NO to any of these questions, the citation/study will be excluded. All other citations will be included.

**Level 2 screening**

1. Does this paper report on a method or application of ITS design or analysis?

Yes \_\_\_\_

No \_\_\_\_

Unclear \_\_\_\_

2. Is the study related to health (i.e., philosophy, health, education)?

Yes \_\_\_\_

No \_\_\_\_

Unclear \_\_\_\_

3. Is there a clearly defined time point when intervention was started or implemented?

Yes \_\_\_\_

No \_\_\_\_

Unclear \_\_\_\_

1  
2  
3 4. Are there at least three time points before and after implementation of intervention?  
4  
5

6 Yes\_\_\_\_

7 No\_\_\_\_

8  
9 Unclear\_\_\_\_

10  
11 5. Was the study outcome objectively measured?

12 Yes\_\_\_\_

13 No\_\_\_\_

14  
15  
16  
17 Unclear\_\_\_\_

18 If you answer NO to any of these questions, the citation will be excluded. All other full-text  
19 articles will be included  
20  
21  
22  
23  
24  
25  
26  
27  
28  
29  
30  
31  
32  
33  
34  
35  
36  
37  
38  
39  
40  
41  
42  
43  
44  
45  
46  
47  
48  
49  
50  
51  
52  
53  
54  
55  
56  
57  
58  
59  
60



1  
2  
3  
4  
5  
6  
7 APPENDIX C:  
8

9 DATA ABSTRACTION  
10

11 **General Study Characteristics**  
12

- 13  
14 1. First author  
15 2. Year of publication  
16 3. Journal and type of journal (i.e., general or specialty)  
17 4. Type of article (i.e. methodological or application)  
18 5. Discipline  
19 6. Title of Article  
20 7. Key article or article complementary to a previously suggested method  
21 8. Country  
22 9. Sponsorship or funding source  
23  
24  
25  
26

27 **Methodological papers:**  
28

- 29 1. Name of Method  
30 2. General description of methods  
31 3. Type of outcome.  
32 4. Study type that the methodology is applicable to (only if this is clearly mentioned in the  
33 text)  
34 5. Software used to implement method.  
35 6. Were any assumptions made or tested?  
36 7. Was the model validated? If so, how? How good was the performance of the model?  
37 8. Was there a comparison of methods? What statistical methods were used to do the  
38 comparison?  
39 9. Was the data management process reported?  
40 10. Description of the data management process for the analysis  
41  
42  
43  
44  
45

46 **Application papers:**  
47

- 48 1. Discipline or field of application (pharmacy, guideline development, etc)  
49 2. Description of study (e.g. number of interruptions)  
50 3. Setting of study (e.g. single site, multi-site)  
51 4. Analysis Method used  
52 5. Number of time points in each phase  
53 6. Type of primary outcome (Continuous, binary, count)  
54 7. Number of outcomes  
55  
56  
57  
58  
59  
60

8. Kind of data (audit, retrospective, survey)
9. Number of patients at each time point/period (if reported)
10. Assumptions tested or checked
11. Justification for performing ITS analysis
12. Methods and models used to estimate the effect of intervention
13. Approaches used reporting of summary estimates (e.g. figures, tables, text)

For peer review only

# BMJ Open

## Methods, Applications, Interpretations and Challenges of Interrupted Time Series (ITS) Data: Protocol for a Scoping Review

|                                 |                                                                                                                                                                                                                                                                                                                                                                                                                                                                                                                                                                                                                                                                                                                                                                                                                                                                                                                                    |
|---------------------------------|------------------------------------------------------------------------------------------------------------------------------------------------------------------------------------------------------------------------------------------------------------------------------------------------------------------------------------------------------------------------------------------------------------------------------------------------------------------------------------------------------------------------------------------------------------------------------------------------------------------------------------------------------------------------------------------------------------------------------------------------------------------------------------------------------------------------------------------------------------------------------------------------------------------------------------|
| Journal:                        | <i>BMJ Open</i>                                                                                                                                                                                                                                                                                                                                                                                                                                                                                                                                                                                                                                                                                                                                                                                                                                                                                                                    |
| Manuscript ID                   | bmjopen-2017-016018.R1                                                                                                                                                                                                                                                                                                                                                                                                                                                                                                                                                                                                                                                                                                                                                                                                                                                                                                             |
| Article Type:                   | Protocol                                                                                                                                                                                                                                                                                                                                                                                                                                                                                                                                                                                                                                                                                                                                                                                                                                                                                                                           |
| Date Submitted by the Author:   | 19-Apr-2017                                                                                                                                                                                                                                                                                                                                                                                                                                                                                                                                                                                                                                                                                                                                                                                                                                                                                                                        |
| Complete List of Authors:       | Ewusie, Joycelyne; McMaster University<br>Blondal, Erik; University of Toronto, Institute of Health Policy Management and Evaluation (IHPME); Li Ka Shing Knowledge Institute, St Michael's Hospital<br>Soobiah, Charlene; University of Toronto, Institute of Health Policy Management and Evaluation (IHPME); Li Ka Shing Knowledge Institute, St Michael's Hospital<br>Beyene, Joseph; McMaster University, Department of Clinical Epidemiology and Biostatistics<br>Thabane, Lehana; McMaster University, Department of Clinical Epidemiology and Biostatistics; St Joseph's Healthcare, Biostatistics Unit, Father Sean O'Sullivan Research Centre<br>Straus, Sharon; St. Michael's Hospital, Li Ka Shing Knowledge Institute; University of Toronto Faculty of Medicine<br>Hamid, Jemila; Li Ka Shing Knowledge Institute, St Michael's Hospital; McMaster University, Department of Clinical Epidemiology and Biostatistics |
| <b>Primary Subject Heading</b>: | Research methods                                                                                                                                                                                                                                                                                                                                                                                                                                                                                                                                                                                                                                                                                                                                                                                                                                                                                                                   |
| Secondary Subject Heading:      | Geriatric medicine, Epidemiology                                                                                                                                                                                                                                                                                                                                                                                                                                                                                                                                                                                                                                                                                                                                                                                                                                                                                                   |
| Keywords:                       | Interrupted time series, segmented regression, scoping review                                                                                                                                                                                                                                                                                                                                                                                                                                                                                                                                                                                                                                                                                                                                                                                                                                                                      |
|                                 |                                                                                                                                                                                                                                                                                                                                                                                                                                                                                                                                                                                                                                                                                                                                                                                                                                                                                                                                    |

SCHOLARONE™  
Manuscripts

# Methods, Applications, Interpretations and Challenges of Interrupted Time Series (ITS) Data: Protocol for a Scoping Review

Joycelyne E. Ewusie,<sup>1</sup> Erik Blondal,<sup>2,3</sup> Charlene Soobiah,<sup>2,3</sup> Joseph Beyene,<sup>1</sup> Lehana Thabane,<sup>1,4</sup> Sharon Straus,<sup>2,5</sup> Jemila S Hamid<sup>1,2</sup>

<sup>1</sup>Department of Clinical Epidemiology and Biostatistics, McMaster University, Hamilton, Ontario, Canada

<sup>2</sup>Li Ka Shing Knowledge Institute of St Michael's Hospital, Toronto, Ontario, Canada

<sup>3</sup>Institute of Health Policy Management and Evaluation (IHPME), University of Toronto, Toronto, Ontario, Canada

<sup>4</sup>Biostatistics Unit, Father Sean O'Sullivan Research Centre, St Joseph's Healthcare, Hamilton, Ontario, Canada

<sup>5</sup>Department of Medicine, Faculty of Medicine, University of Toronto, Toronto, Ontario, Canada

Corresponding Author

Dr Jemila S Hamid: [jhamid@mcmaster.ca](mailto:jhamid@mcmaster.ca)

## ABSTRACT

**Objectives:** Interrupted time series (ITS) design involves collecting data across multiple time points before and after the implementation of an intervention to assess the effect of the intervention on an outcome. ITS designs have become increasingly common in recent times with frequent use in assessing impact of evidence implementation interventions. Several statistical methods are currently available for analyzing data from ITS designs, however, there is a lack of guidance on which methods are optimal for different data types and on their implications in interpreting results. Our objective is to conduct a scoping review of existing methods for analyzing ITS data, to summarize their characteristics and properties, as well as to examine how the results are reported. We also aim to identify gaps and methodological deficiencies.

**Methods and analysis:** We will search electronic databases from inception until August 2016 (e.g., MEDLINE, and JSTOR). Two reviewers will independently screen titles, abstracts and full-text articles and complete the data abstraction. The anticipated outcome will be a summarized description of all the methods that have been used in analyzing ITS data in health research, how those methods were applied, their strengths and limitations and the transparency of interpretation/reporting of the results. We will provide summary tables of the characteristics of the included studies. We will also describe the similarities and differences of the various methods.

**Ethics and dissemination:** Ethical approval is not required for this study since we are just considering the methods used in the analysis and there will not be identifiable patient data. Results will be disseminated through open access peer-reviewed publications.

### Strengths and Limitations of this Study

- Interrupted time series (ITS) is the strongest and most commonly utilized quasi-experimental design that is used to assess the effect of an intervention when randomization is not feasible.
- This review will be the first of its kind to provide a comprehensive overview of the methods available in the analysis of data obtained from ITS designs as well as provide characteristics of these current methods as applied in health research.
- The review is limited to articles published in English language.
- This review study will not assess the quality of the papers or the methods themselves.

**Keywords:** Interrupted time series, segmented regression, scoping review

## INTRODUCTION

Quasi-experimental designs are alternative approaches to assess the effect of interventions in healthcare settings when randomization is impossible, unethical or not feasible due to scarce resources [1]. Quasi experimental designs are divided into four study design groups namely: a) Quasi Experimental designs without control group b) Quasi experimental design with control groups but no pretest, c) Quasi experimental design with control groups and pretest and d) Interrupted time series designs. [2]

Interrupted time series (ITS) is a robust quasi-experimental design and is most commonly utilized in implementation science to evaluate the effect of interventions such as quality improvement programs or policy changes [2,3,4]. In ITS designs, data are collected before and after the implementation or introduction of an intervention to examine whether the intervention influenced the outcome of interest relative to the underlying secular trend [5] as well as competing non-contemporaneous interventions.

In recent times, ITS design has been increasingly common with several applications in clinical and health services research. For instance, the ITS method has been used in assessing the impact of a variety of evidence implementation strategies in different settings, which include assessing the effect of prevention programs, policy changes and quality improvement initiatives in hospitals [4,6,7,8,9]. ITS designs are included in Cochrane reviews done by the Effective Practice and Organisation of Care Review group [10].

There are several models for analyzing ITS data such as segmented regression analysis and ARIMA. Segmented regression or change-point model is likely the most common statistical method for analyzing data from ITS design [11]. In segmented regression analysis, a piece-wise regression is fitted to the data allowing each segment of the time series to exhibit different levels

1  
2  
3 and trends. The effect of the intervention is then examined by comparing the slopes and  
4  
5 intercepts for the pre- and post-intervention phases [12]. A change in the intercept or level  
6  
7 constitutes an immediate intervention effect while a change in slope or trend implies an effect  
8  
9 that was experienced over time. A change in trend also allows us to measure the sustainability of  
10  
11 the impact of the intervention. Furthermore, segmented regression analysis enables analysts to  
12  
13 control for other variables, other than the intervention, that can cause a change in level or trend  
14  
15 of the outcome of interest [12].  
16  
17  
18  
19

20  
21 Despite the various statistical methods that are available for analyzing ITS data, it is not  
22  
23 clear which methods are optimal for the different data types and how using different analyses  
24  
25 may affect results. As such, researchers and particularly, novice users of the ITS design are  
26  
27 unaware of the various methods available. Thus, researchers often use methods such as  
28  
29 segmented linear regression to analyze their ITS data, which can lead to spurious results and  
30  
31 consequently unreliable conclusions about the effect of interventions. Commonly used methods  
32  
33 for analyzing ITS data are often inappropriate when the data are aggregated per time point or the  
34  
35 data are from a skewed distribution, and are often susceptible to aggregation bias, imprecision  
36  
37 and loss of power [4,8]. It is therefore imperative that the various methods available for  
38  
39 analyzing ITS data are identified to not only inform researchers of which methods are available  
40  
41 for different data types but also to inform future research such that the limitations and gaps of the  
42  
43 current methods can be adequately addressed.  
44  
45  
46  
47  
48

49  
50 Our goal is thus to conduct a scoping review to identify the available methods used in  
51  
52 ITS analysis, compare the methods in terms of their strengths and limitations and evaluate the  
53  
54 application of the methods as well as identify the methodological gaps with the purpose of  
55  
56 addressing the gaps. We aim to:  
57  
58  
59  
60

- 1
- 2
- 3
- 4 1. Identify and describe available methods used in ITS data analysis.
- 5
- 6 2. Describe the similarities and differences between the methods.
- 7
- 8 3. Describe the strengths and limitations of each method.
- 9
- 10 4. Provide a review of the application of the methods, that is how they are used, where they
- 11 are used and the information they provide.
- 12
- 13 5. Examine how results are reported and provide a comprehensive description of their
- 14 interpretation
- 15
- 16 6. Identify gaps in methodology and provide direction for future research.
- 17
- 18
- 19
- 20
- 21
- 22
- 23
- 24
- 25
- 26
- 27
- 28
- 29
- 30
- 31

## 32 **METHODS AND ANALYSIS**

33  
34 We will conduct a scoping review using the methods proposed by Arkley and O'Malley [13] and  
35 the Joanna Briggs Handbook for conducting systematic scoping reviews [14]. We will first  
36 perform a systematic literature search for health research studies that employed interrupted time  
37 series design and then use the methodological framework of Arkley and O'Malley to facilitate  
38 the identification of gaps and methodological deficiencies in the existing literature.  
39  
40  
41  
42  
43  
44

### 45 **Search Strategy**

46  
47  
48 For this study, an experienced information scientist helped to develop the search strategy which  
49 will be used to search electronic databases including MEDLINE, JSTOR, PUBMED, EMBASE,  
50  
51  
52  
53  
54  
55  
56  
57  
58  
59  
60  
61  
62  
63  
64  
65  
66  
67  
68  
69  
70  
71  
72  
73  
74  
75  
76  
77  
78  
79  
80  
81  
82  
83  
84  
85  
86  
87  
88  
89  
90  
91  
92  
93  
94  
95  
96  
97  
98  
99  
100  
101  
102  
103  
104  
105  
106  
107  
108  
109  
110  
111  
112  
113  
114  
115  
116  
117  
118  
119  
120  
121  
122  
123  
124  
125  
126  
127  
128  
129  
130  
131  
132  
133  
134  
135  
136  
137  
138  
139  
140  
141  
142  
143  
144  
145  
146  
147  
148  
149  
150  
151  
152  
153  
154  
155  
156  
157  
158  
159  
160  
161  
162  
163  
164  
165  
166  
167  
168  
169  
170  
171  
172  
173  
174  
175  
176  
177  
178  
179  
180  
181  
182  
183  
184  
185  
186  
187  
188  
189  
190  
191  
192  
193  
194  
195  
196  
197  
198  
199  
200  
201  
202  
203  
204  
205  
206  
207  
208  
209  
210  
211  
212  
213  
214  
215  
216  
217  
218  
219  
220  
221  
222  
223  
224  
225  
226  
227  
228  
229  
230  
231  
232  
233  
234  
235  
236  
237  
238  
239  
240  
241  
242  
243  
244  
245  
246  
247  
248  
249  
250  
251  
252  
253  
254  
255  
256  
257  
258  
259  
260  
261  
262  
263  
264  
265  
266  
267  
268  
269  
270  
271  
272  
273  
274  
275  
276  
277  
278  
279  
280  
281  
282  
283  
284  
285  
286  
287  
288  
289  
290  
291  
292  
293  
294  
295  
296  
297  
298  
299  
300  
301  
302  
303  
304  
305  
306  
307  
308  
309  
310  
311  
312  
313  
314  
315  
316  
317  
318  
319  
320  
321  
322  
323  
324  
325  
326  
327  
328  
329  
330  
331  
332  
333  
334  
335  
336  
337  
338  
339  
340  
341  
342  
343  
344  
345  
346  
347  
348  
349  
350  
351  
352  
353  
354  
355  
356  
357  
358  
359  
360  
361  
362  
363  
364  
365  
366  
367  
368  
369  
370  
371  
372  
373  
374  
375  
376  
377  
378  
379  
380  
381  
382  
383  
384  
385  
386  
387  
388  
389  
390  
391  
392  
393  
394  
395  
396  
397  
398  
399  
400  
401  
402  
403  
404  
405  
406  
407  
408  
409  
410  
411  
412  
413  
414  
415  
416  
417  
418  
419  
420  
421  
422  
423  
424  
425  
426  
427  
428  
429  
430  
431  
432  
433  
434  
435  
436  
437  
438  
439  
440  
441  
442  
443  
444  
445  
446  
447  
448  
449  
450  
451  
452  
453  
454  
455  
456  
457  
458  
459  
460  
461  
462  
463  
464  
465  
466  
467  
468  
469  
470  
471  
472  
473  
474  
475  
476  
477  
478  
479  
480  
481  
482  
483  
484  
485  
486  
487  
488  
489  
490  
491  
492  
493  
494  
495  
496  
497  
498  
499  
500  
501  
502  
503  
504  
505  
506  
507  
508  
509  
510  
511  
512  
513  
514  
515  
516  
517  
518  
519  
520  
521  
522  
523  
524  
525  
526  
527  
528  
529  
530  
531  
532  
533  
534  
535  
536  
537  
538  
539  
540  
541  
542  
543  
544  
545  
546  
547  
548  
549  
550  
551  
552  
553  
554  
555  
556  
557  
558  
559  
560  
561  
562  
563  
564  
565  
566  
567  
568  
569  
570  
571  
572  
573  
574  
575  
576  
577  
578  
579  
580  
581  
582  
583  
584  
585  
586  
587  
588  
589  
590  
591  
592  
593  
594  
595  
596  
597  
598  
599  
600  
601  
602  
603  
604  
605  
606  
607  
608  
609  
610  
611  
612  
613  
614  
615  
616  
617  
618  
619  
620  
621  
622  
623  
624  
625  
626  
627  
628  
629  
630  
631  
632  
633  
634  
635  
636  
637  
638  
639  
640  
641  
642  
643  
644  
645  
646  
647  
648  
649  
650  
651  
652  
653  
654  
655  
656  
657  
658  
659  
660  
661  
662  
663  
664  
665  
666  
667  
668  
669  
670  
671  
672  
673  
674  
675  
676  
677  
678  
679  
680  
681  
682  
683  
684  
685  
686  
687  
688  
689  
690  
691  
692  
693  
694  
695  
696  
697  
698  
699  
700  
701  
702  
703  
704  
705  
706  
707  
708  
709  
710  
711  
712  
713  
714  
715  
716  
717  
718  
719  
720  
721  
722  
723  
724  
725  
726  
727  
728  
729  
730  
731  
732  
733  
734  
735  
736  
737  
738  
739  
740  
741  
742  
743  
744  
745  
746  
747  
748  
749  
750  
751  
752  
753  
754  
755  
756  
757  
758  
759  
760  
761  
762  
763  
764  
765  
766  
767  
768  
769  
770  
771  
772  
773  
774  
775  
776  
777  
778  
779  
780  
781  
782  
783  
784  
785  
786  
787  
788  
789  
790  
791  
792  
793  
794  
795  
796  
797  
798  
799  
800  
801  
802  
803  
804  
805  
806  
807  
808  
809  
810  
811  
812  
813  
814  
815  
816  
817  
818  
819  
820  
821  
822  
823  
824  
825  
826  
827  
828  
829  
830  
831  
832  
833  
834  
835  
836  
837  
838  
839  
840  
841  
842  
843  
844  
845  
846  
847  
848  
849  
850  
851  
852  
853  
854  
855  
856  
857  
858  
859  
860  
861  
862  
863  
864  
865  
866  
867  
868  
869  
870  
871  
872  
873  
874  
875  
876  
877  
878  
879  
880  
881  
882  
883  
884  
885  
886  
887  
888  
889  
890  
891  
892  
893  
894  
895  
896  
897  
898  
899  
900  
901  
902  
903  
904  
905  
906  
907  
908  
909  
910  
911  
912  
913  
914  
915  
916  
917  
918  
919  
920  
921  
922  
923  
924  
925  
926  
927  
928  
929  
930  
931  
932  
933  
934  
935  
936  
937  
938  
939  
940  
941  
942  
943  
944  
945  
946  
947  
948  
949  
950  
951  
952  
953  
954  
955  
956  
957  
958  
959  
960  
961  
962  
963  
964  
965  
966  
967  
968  
969  
970  
971  
972  
973  
974  
975  
976  
977  
978  
979  
980  
981  
982  
983  
984  
985  
986  
987  
988  
989  
990  
991  
992  
993  
994  
995  
996  
997  
998  
999  
1000



1  
2  
3 conference abstracts from relevant statistical conferences and contacting methodological experts  
4  
5 in the field of ITS to identify difficult-to-locate or unpublished material. A draft of the literature  
6  
7 search for MEDLINE can be found in Appendix A. The search strategy will be modified  
8  
9 accordingly when necessary for other databases. Additionally, references of the included studies  
10  
11 will be scanned for relevant articles.  
12  
13

### 14 15 16 17 18 19 **Eligibility Criteria**

20  
21 All studies that report the development, application or comparison of methods employed in the  
22  
23 analysis of ITS data will be included. To be included in the analysis, studies must have at least  
24  
25 three time points before and after the intervention, have a clearly defined point in time when the  
26  
27 intervention was implemented or a definition of the time within which the intervention was  
28  
29 rolled out since most interventions are rolled out over a period. Also, the study outcomes must be  
30  
31 measured objectively. This criteria is in accordance with the Effective Practice and Organization  
32  
33 of Care (EPOC) Cochrane Group definition of an ITS design [10]. There will be no restrictions  
34  
35 on the publication status. We will exclude ITS studies that are not related to health research. We  
36  
37 define health based on the WHO definition that is, complete mental, physical and social well-  
38  
39 being (<http://www.who.int/about/definition/en/print.html>). Studies that were written in languages  
40  
41 other than English will be excluded due to resource limitations. Review papers will be excluded  
42  
43 but their references will be scanned for relevant articles.  
44  
45  
46  
47  
48  
49  
50  
51  
52  
53  
54  
55  
56  
57  
58  
59  
60

## Study Selection

We will import search results, screen citations and full text articles into Endnote X6 desktop version. A calibration exercise will be held prior to the commencement of screening of titles and abstracts to ensure reliability. For these pilot runs, each reviewer will screen a random sample of 50 citations for inclusion. Inter-rater agreement for study inclusion will then be calculated and a percentage agreement value >80% will imply we can commence screening. A value <80% will imply poor agreement and hence the eligibility criteria will be modified and clarified with the reviewers. A second pilot will be run with another random sample of 50 citations. This process will be repeated until we reach an agreement >80% and then the screening will begin. Each title and abstract will be screened independently by two reviewers (CS or EB and JEE) for inclusion using the eligibility criteria (Level 1 screening). This will be followed by full text screening of potentially relevant articles by the reviewers to determine inclusion using the same or modified eligibility criteria (Level 2 screening). If the eligibility criteria for level 2 are modified, a training session will be conducted prior to level 2 screening. Conflicts will be resolved by discussion or involvement of a third reviewer (JSH or JB). The PRISMA flow chart will be used to report study selection. A draft of the eligibility form can be found in Appendix B.

## Data Abstraction

General study characteristics such as authorship and year of publication will be abstracted. Other characteristics will be abstracted based on the type of article. For instance, for methodological articles we will obtain the general description of the methods, the type of outcome (e.g. continuous, binary), and the similarities and differences of the methods either reported by the authors or based on our own perspective. For articles that report the use of an ITS

1  
2  
3 design/analysis (application articles), data to be abstracted will include the characteristics of the  
4 study design (number of intervention phases, e.g. Pre-and Post-intervention for 2 phases), the  
5 rationale for using an ITS design/analysis, the statistical methods used, assumptions checked and  
6 approaches used to summarize the results. Examples used in methodological articles will be  
7 treated as separate applications and all relevant data will be extracted where necessary. A draft of  
8 the data abstraction form is found in Appendix C. The data abstraction form will be piloted on a  
9 random sample of 50 included studies and modified as required. The abstraction process will be  
10 completed by JEE in consultations with JSH.  
11  
12  
13  
14  
15  
16  
17  
18  
19  
20  
21  
22  
23  
24  
25

### 26 **Risk of bias appraisal**

27  
28 Since this is a scoping review, we will not appraise methodological quality or risk of bias of  
29 included studies [13].  
30  
31  
32  
33  
34  
35

### 36 **Data Summary**

37  
38 For the descriptive analysis, information will be summarized based on the type of articles the  
39 data was extracted from. For the methods papers, we will narratively describe each of the  
40 methods used for analyses such as segmented linear regression and ARIMA, the assumptions  
41 made or tested, outcome data type such as continuous or binary, and applicability of the method  
42 to different outcomes of interest based on information provided by the authors, the data  
43 summarization process for appropriate ITS analysis as well as the similarities and differences  
44 between different methods.  
45  
46  
47  
48  
49  
50  
51  
52  
53  
54  
55  
56  
57  
58  
59  
60

1  
2  
3 For the application papers, we will summarise; the frequency of use of the method; the  
4 kind of data the method is applied to such as audit, and survey data; the setting in which the ITS  
5 design was implemented, such as hospitals or communities; and number of interruption times or  
6 phases of intervention.  
7  
8  
9  
10  
11

12  
13 In addition, we will evaluate results interpretation as well as the transparency of reporting  
14 of findings by assessing the information provided by the authors. This will include information  
15 on the different ways estimates obtained are reported and interpreted. The characteristics of the  
16 included studies will be provided using summary tables and matrix tables will also be created to  
17 compare the various ITS methods and the different ways of reporting and interpretation of  
18 findings based on how the data was summarized for analysis. Quantitative data such as the  
19 number of time points and number of patients per timepoint will be summarized by medians and  
20 IQRs and categorical data such as outcome data type will be summarized by frequencies and  
21 percentages. Finally, we will provide a summary of the methodological gaps that will be  
22 identified and highlight some potential areas for future research.  
23  
24  
25  
26  
27  
28  
29  
30  
31  
32  
33  
34  
35  
36  
37  
38  
39  
40  
41

## 42 **ETHICS AND DISSEMINATION**

43 This is a scoping review of completed studies and hence no ethical approval is required. Quasi-  
44 experimental designs, such as ITS have been identified as the best alternative to investigate the  
45 effect of an intervention when randomization is not feasible and has been utilized several times  
46 in implementation science [1]. There have been several limitations that have been identified with  
47 the frequently used methods of analyzing data from ITS design making them suboptimal  
48 [4,5,8,9]. For example, when segmented regression is applied to aggregated data where data at  
49  
50  
51  
52  
53  
54  
55  
56  
57  
58  
59  
60

1  
2  
3 each time point is no longer observed but estimated and hence associated with imprecision.  
4  
5 Additionally, although several methods exist, it is not clear which of the methods are optimal for  
6  
7 different data types. Finding out the various methods available and when each method will be  
8  
9 appropriate is necessary to ensure quality analysis of data since using different analyses may lead  
10  
11 to different results.  
12  
13

14  
15 This study will provide detailed information on the available methods used under  
16  
17 different scenarios and thus strengthen the validity of research that utilizes ITS methods.  
18  
19 Subsequently, we will identify methodological gaps for future research into various ways of  
20  
21 improving ITS data analysis through both simulation and empirical studies. Thus, this review  
22  
23 will serve as a ground work towards developing a guidance manuscript or book on methods for  
24  
25 ITS analysis. This review will be the first of its kind to provide a comprehensive overview of the  
26  
27 methods available in the analysis of data obtained from quasi-experimental designs as well as  
28  
29 provide characteristics of these current methods as applied in health research. Informed consent  
30  
31 and ethical assessment was not required for this study since secondary data with non-identifiable  
32  
33 individual patient data will be used.  
34  
35  
36  
37  
38

39  
40 This scoping review will be relevant not just to statisticians and methodologists but also  
41  
42 to other stakeholders such as health professionals and policy makers, and most importantly those  
43  
44 interested in implementation science.  
45  
46  
47  
48  
49

## 50 51 **Acknowledgement**

52  
53 The authors thank Mr. Andrew Colgoni for helping to develop the search strategy for the  
54  
55 literature search.  
56  
57  
58  
59  
60

**Contributors**

JEE, SES and JSH conceived and designed the study and helped write the draft protocol. JB and LT helped design the study and reviewed the protocol critically for intellectual content. EB and CS participated in data collection and edited the protocol. All authors have read and approved the final protocol.

**Funding**

This research received no specific grant from any funding agency in the public, commercial or not-for-profit sectors.

**Competing interests**

None declared.

## References

1. Michielutte R, Shelton B, Paskett ED, Tatum CM, Velez R. Use of an interrupted time-series design to evaluate a cancer screening program. *Health Education Research, Theory and Practice* 2000,15(5):615-623
2. Harris AD, McGregor JC, Perencevich EN, Furuno JP, Zhu J, Peterson DE, Finkelstein J. The use and interpretation of quasi-experimental studies in medical informatics. *Journal of the American Medical Informatics Association*. 2006,13(1):16-23.
3. Wagner AK, Soumerai SB, Ghang F, Ross-Degnan D. Segmented regression analysis of interrupted time series studies in medication use research. *Journal of Clinical Pharmacy and Therapeutics* 2002, 27:299-309
4. Taljaard M, Mckenzie J, Ramsay CR, Grimshaw JM. The use of segmented regression in analyzing interrupted time series studies: an example in pre-hospital ambulance care. *Implementation Science* 2014, 9:77
5. Ramsay CR, Matowe L, Grilli R, Grimshaw JM, Thomas RE. Interrupted time series designs in health technology assessment: lessons from two systematic reviews of behaviour change strategies. *International Journal of Health Technology Assessment in Health Care* 2003; 19:613-23.
6. Kastner M, Sawka AM, Hamid JS, Chen M, Thorpe K, Chignell M, Ewusie J, Marquez C, Newton D, Straus SE. A knowledge translation tool improved osteoporosis disease management in primary care: an interrupted time series analysis. *Implementation Science* 2014, 9:109 doi:10.1186/s13012-014-0109-9
7. Liu B, Almaawiy U, Moore JE, Chan WH, Straus SE and the MOVE ON Team. Evaluation of a multisite educational intervention to improve mobilization of older patients in hospital: protocol for mobilization of vulnerable elders in Ontario (MOVE ON). *Implementation Science* 2013, 8:76
8. Gebiski V, Ellingson K, Edwards J, Jernigan J, Kleinbaum D. Modelling interrupted time series to evaluate prevention and control of infection in healthcare. *Epidemiology and Infection*. 2012 Dec 1;140(12):2131-41.
9. Zhang F, Wagner AK, Soumerai SB, Ross-Degnan D. Methods for estimating confidence intervals in interrupted time series analyses of health interventions. *Journal of Clinical Epidemiology* 2009,62:143-148

10. Bero L, Grilli R, Grimshaw JM, et al. The Cochrane Effective Practice and Organisation of care Group (EPOC) Module. In: The Cochrane Library. Oxford: Update Software, 2002 Issue 1.
11. Shardell M, Harris AD, El-Kamary S, Furuno JP, Miller R, Perencevich EN. Statistical analysis and application of quasi experiments to antimicrobial resistance intervention studies. *Antimicrobial resistance* 2007, 45:901:907.
12. Wang, Joanna JJ, Scott W, Raphael G, Jake O. "A comparison of statistical methods in interrupted time series analysis to estimate an intervention effect." In *Australasian Road Safety Research, Policing and Education Conference*. 2013.
13. Arksey H, O'Malley L. "Scoping studies: towards a methodological framework." *International Journal of social research methodology* 2005, 8.1:19-32.
14. Peters MD, Godfrey CM, Khalil H, McInerney P, Parker D, Soares CB. Guidance for conducting systematic scoping reviews. *International journal of evidence-based healthcare* 2015, 13(3), 141-146.



## APPENDIX A:

Database: Ovid MEDLINE(R) In-Process & Other Non-Indexed Citations, Ovid MEDLINE(R) Daily and Ovid MEDLINE(R) <1946 to Present>  
Search Strategy:

- 
- 1 Interrupted Time Series Analysis.mp.
  - 2 "change point model\$.mp.
  - 3 Interrupted Time Series Analysis/  
4 (interrupt\$ adj3 (time\$ series\$ or time-series)).mp.
  - 5 (Interven\$ adj3 (time\$ series\$ or time-series)).mp.
  - 6 (segment\$ adj2 regression\$.mp.
  - 7 ((time\$ series\$ or time-series) adj2 regression\$.mp.
  - 8 1 or 2 or 3 or 4 or 5 or 6 or 7
  - 9 limit 8 to english language

## APPENDIX B:

## ELIGIBILITY CRITERIA

**Level 1 screening**

1. Does this paper report on a method or application/review of ITS design or analysis?

YES\_\_\_\_

NO\_\_\_\_

UNCLEAR\_\_\_\_

2. Is the study related to health as defined by the WHO (i.e., philosophy, health, education)?

YES\_\_\_\_

NO\_\_\_\_

UNCLEAR\_\_\_\_

If you answer NO to any of these questions, the citation/study will be excluded. All other citations will be included.

**Level 2 screening**

1. Does this paper report on a method or application of ITS design or analysis?

Yes\_\_\_\_

No\_\_\_\_

Unclear\_\_\_\_

2. Is the study related to health (i.e., philosophy, health, education)?

Yes\_\_\_\_

No\_\_\_\_

Unclear\_\_\_\_

3. Is there a clearly defined time point when intervention was started or implemented?

Yes\_\_\_\_

No\_\_\_\_

Unclear\_\_\_\_

4. Are there at least three time points before and after implementation of intervention?

Yes\_\_\_\_

1  
2  
3 No\_\_\_\_

4  
5 Unclear\_\_\_\_

6  
7 5. Was the study outcome objectively measured?

8  
9 Yes\_\_\_\_

10  
11 No\_\_\_\_

12  
13 Unclear\_\_\_\_

14  
15 If you answer NO to any of these questions, the citation will be excluded. All other full-text  
16 articles will be included

17  
18  
19  
20  
21  
22  
23  
24  
25  
26  
27  
28  
29  
30  
31  
32  
33  
34  
35  
36  
37  
38  
39  
40  
41  
42  
43  
44  
45  
46  
47  
48  
49  
50  
51  
52  
53  
54  
55  
56  
57  
58  
59  
60

For peer review only

## APPENDIX C:

## DATA ABSTRACTION

**General Study Characteristics**

1. First author
2. Year of publication
3. Journal and type of journal (i.e., general or specialty)
4. Type of article (i.e. methodological or application)
5. Discipline
6. Title of Article
7. Key article or article complementary to a previously suggested method
8. Country
9. Sponsorship or funding source

**Methodological papers:**

1. Name of Method
2. General description of methods
3. Type of outcome.
4. Study type that the methodology is applicable to (only if this is clearly mentioned in the text)
5. Software used to implement method.
6. Were any assumptions made or tested?
7. Was the model validated? If so, how? How good was the performance of the model?
8. Was there a comparison of methods? What statistical methods were used to do the comparison?
9. Was the data management process reported?
10. Description of the data management process for the analysis

**Application papers:**

1. Discipline or field of application (pharmacy, guideline development, etc)
2. Description of study (e.g. number of interruptions)
3. Setting of study (e.g. single site, multi-site)
4. Analysis Method used
5. Number of time points in each phase
6. Type of primary outcome (Continuous, binary, count)
7. Number of outcomes
8. Kind of data (audit, retrospective, survey)
9. Number of patients at each time point/period (if reported)
10. Assumptions tested or checked
11. Justification for performing ITS analysis

- 1
  - 2
  - 3
  - 4
  - 5
  - 6
  - 7
  - 8
  - 9
  - 10
  - 11
  - 12
  - 13
  - 14
  - 15
  - 16
  - 17
  - 18
  - 19
  - 20
  - 21
  - 22
  - 23
  - 24
  - 25
  - 26
  - 27
  - 28
  - 29
  - 30
  - 31
  - 32
  - 33
  - 34
  - 35
  - 36
  - 37
  - 38
  - 39
  - 40
  - 41
  - 42
  - 43
  - 44
  - 45
  - 46
  - 47
  - 48
  - 49
  - 50
  - 51
  - 52
  - 53
  - 54
  - 55
  - 56
  - 57
  - 58
  - 59
  - 60
12. Methods and models used to estimate the effect of intervention
13. Approaches used reporting of summary estimates (e.g. figures, tables, text)

For peer review only
